# Supplementary material
Source: PubMed Central journal article supplement (PMC10921393)
Supplement: NIHMS1962801-supplement-Suppl_Table3.pdf [file NIHMS1962801-supplement-Suppl_Table3.pdf]

**Supplementary Table 3: Sensitivity Analysis-Association of total sugar with dementia among participants without diabetes at baseline**

| Total Sugar    | Dementia          |
|----------------|-------------------|
| Q1             | Ref               |
| Q3 HR (95% CI) | 1.74 (0.84, 3.63) |
| Q5 HR (95% CI) | 2.30 (1.08, 4.94) |
| p-trend        | 0.04              |

(N=686 MPA participants after removing those with diabetes at baseline)

Cox proportional hazard model controlled for age, sex, education, APOe-4 status, total calories from non-sugar sources, MIND diet score, and physical activity.
