# Supplementary material
Source: PubMed Central journal article supplement (PMC10921393)
Supplement: NIHMS1962801-supplement-Suppl_Tables_1_and2_.pdf [file NIHMS1962801-supplement-Suppl_Tables_1_and2_.pdf]

**Supplementary Table 1: Sensitivity Analysis- Strawberry and Pelargonidin Intake Association with AD Pathology among those without dementia or mild cognitive Impairment at the baseline dietary assessment**

|                                                    | <b>Global AD pathology burden</b> | <b>Amyloid Load</b>   | <b>Phosphorylated tau tangles</b> |
|----------------------------------------------------|-----------------------------------|-----------------------|-----------------------------------|
| <b>N</b>                                           | 316                               | 290                   | 308                               |
| <b>Strawberry intake (Model 1)</b>                 |                                   |                       |                                   |
| <b>Continuous</b>                                  | -0.055 (0.04, 0.157)              | -0.159 (0.13, 0.210)  | -0.254 (0.12, 0.040)              |
| <b>Pelargonidin Intake (Model 2)</b>               |                                   |                       |                                   |
| <b>Quartile 1</b>                                  | Ref                               | Ref                   | Ref                               |
| <b>Quartile 2 <math>\beta</math> (SE, p value)</b> | -0.100 (0.06, 0.101)              | -0.362 (0.20, 0.077)  | -0.604 (0.19, 0.002)              |
| <b>Quartile 3 <math>\beta</math> (SE, p value)</b> | -0.109 (0.06, 0.060)              | -0.422 (0.19, 0.0260) | -0.485 (0.18, 0.008)              |
| <b>Quartile 4 <math>\beta</math> (SE, p value)</b> | -0.123 (0.06,0.036)               | -0.283 (0.19, 0.143)  | -0.616 (0.18, 0.001)              |
| <b>P for trend</b>                                 | 0.065                             | 0.270                 | 0.007                             |

Linear regression models Model 1 adjusted for age at death, sex, education, and APO- $\epsilon$ 4 status.

Model 2 adjusted for age at death, sex, education, and APO- $\epsilon$ 4 status, vitamin E and vitamin C.

**Supplementary Table 2: Association of pelargonidin with AD pathology when further controlled for other flavonoids intake.**

|                                  | <b>Global AD pathology burden</b> | <b>Amyloid-<math>\beta</math> Load</b> | <b>Phosphorylated tau tangles</b> |
|----------------------------------|-----------------------------------|----------------------------------------|-----------------------------------|
| N                                | 572                               | 538                                    | 560                               |
| Quartile 1                       | Ref                               | Ref                                    | Ref                               |
| Quartile 2 $\beta$ (SE, p value) | -0.003 (0.04, 0.948)              | -0.068 (0.14, 0.619)                   | -0.212 (0.15, 0.170)              |
| Quartile 3 $\beta$ (SE, p value) | -0.056 (0.04, 0.194)              | -0.255 (0.14, 0.067)                   | -0.329 (0.16, 0.036)              |
| Quartile 4 $\beta$ (SE, p value) | -0.081 (0.04, 0.063)              | -0.265 (0.14, 0.062)                   | -0.321 (0.16, 0.044)              |
| P for trend                      | 0.037                             | 0.043                                  | 0.052                             |

Linear regression model adjusted for age at death, sex, education, and APO- $\epsilon$ 4 status, vitamin E, vitamin C and other flavonoids (included sum of all the flavonoid sub-classes & constituents excluding pelargonidin).
